# Supplementary material
Source: MDPI journal article supplement (https://www.mdpi.com/2673-4834/2/2/20)
Supplement: s1 [file s1]

## Supplementary

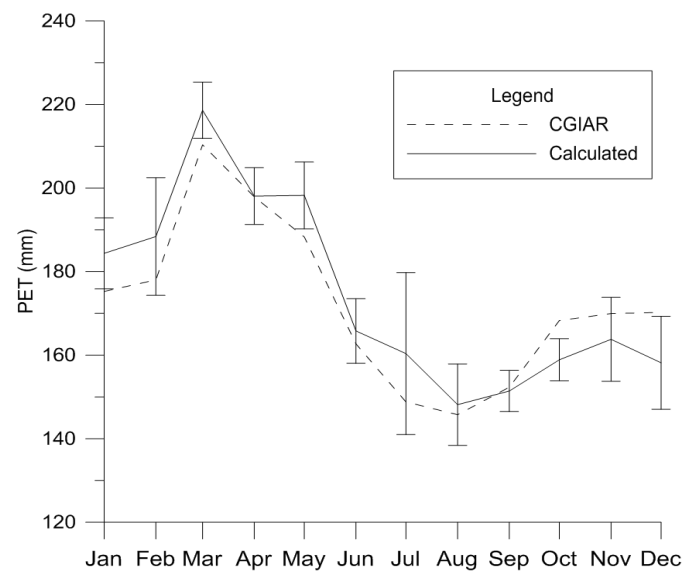

**Figure S1.** Comparison of averaged PET by month using the modified Penman equation for 2003-2011 compared to CGIAR-CSI worldwide monthly averages from 1950-2000.

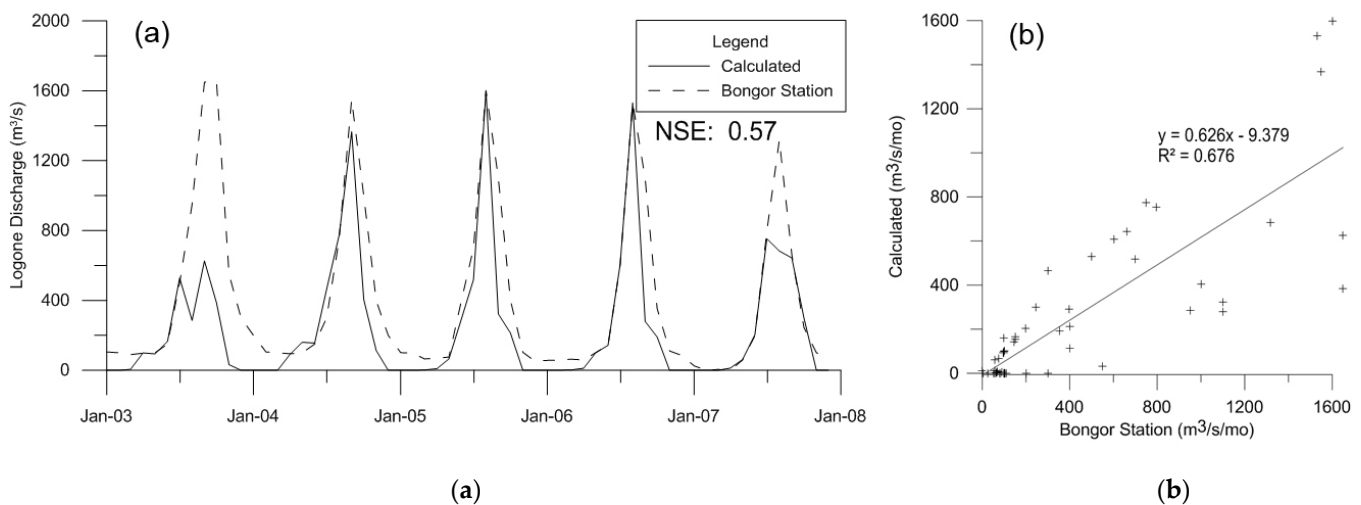

**Figure S2.** *In situ* monthly Logone river discharge data from Bongor station compared to WetSpas-M outputs considering burning (a). Scatter plot of monthly discharge data from 2003 to 2011 for Bongor station compared to model outputs considering burning (b).

**Table S1.** WetSpass-M Vegetative Land Lookup Table.

| Land Use Type       | Vegetated Runoff | Vegetated Area | Bare Area | Impervious Area | Open Water Area | Root Depth | LAI | Min Stomata Opening | Vegetative Height | nManing | Land Factor | Aerodynamic Resistance |
|---------------------|------------------|----------------|-----------|-----------------|-----------------|------------|-----|---------------------|-------------------|---------|-------------|------------------------|
| cropland            | crop             | 0.8            | 0.2       | 0               | 0               | 0.4        | 4   | 180                 | 0.6               | 0.037   | 0.541       | 115.013                |
| burned cropland     | crop             | 0              | 1         | 0               | 0               | 0.4        | 0   | 180                 | 0.6               | 0.02    | 0.541       | 115.013                |
| deciduous forest    | forest           | 1              | 0         | 0               | 0               | 2          | 5   | 250                 | 18                | 0.1     | 0.2         | 27.196                 |
| burned deciduous    | forest           | 0.75           | 0.25      | 0               | 0               | 2          | 5   | 250                 | 18                | 0.02    | 0.2         | 27.196                 |
| coniferous forest   | forest           | 1              | 0         | 0               | 0               | 2          | 6   | 500                 | 15                | 0.1     | 0.2         | 28.631                 |
| burned coniferous   | forest           | 0.75           | 0.25      | 0               | 0               | 2          | 5   | 500                 | 15                | 0.02    | 0.2         | 28.631                 |
| mixed forest        | forest           | 1              | 0         | 0               | 0               | 2          | 5   | 375                 | 16                | 0.1     | 0.2         | 28.098                 |
| burned mixed forest | forest           | 0.75           | 0.25      | 0               | 0               | 2          | 4   | 375                 | 16                | 0.02    | 0.2         | 28.098                 |
| savannah            | grass            | 1              | 0         | 0               | 0               | 0.6        | 6   | 110                 | 2                 | 0.05    | 0.4         | 66.329                 |
| burned savanna      | grass            | 0.15           | 0.85      | 0               | 0               | 0.6        | 5   | 110                 | 2                 | 0.02    | 0.4         | 66.329                 |
| grass               | grass            | 1              | 0         | 0               | 0               | 0.3        | 2   | 140                 | 0.12              | 0.035   | 0.571       | 212.014                |
| burned grass        | grass            | 0              | 1         | 0               | 0               | 0.3        | 0   | 140                 | 0.12              | 0.02    | 0.571       | 212.014                |
